# Supplementary material for: A novel bifunctional chemosensor for bioimaging in living cells with highly sensitive colorimetric and fluorescence detection of CN− and Al3+
Source: Royal Society of Chemistry journal article supplement (doi:10.1039/d1nj04381a), 2021-12-16
Supplement: d1nj04381a1.pdf [file d1nj04381a1.pdf]

### Supplementary information

**Fig. S1.**  $^1\text{H}$  NMR spectra (400 MHz) of **1o** measured in  $\text{DMSO-}d_6$ .

**Fig. S2.**  $^{13}\text{C}$  NMR spectra (100 MHz) of **1o** measured in  $\text{DMSO-}d_6$ .

**Fig. S3.** Mass spectra of **1o**.

**Fig. S4.** Mass spectra of **1o** and  $\text{CN}^-$ .

**Fig. S5.** Mass spectra of **1o** and  $\text{Al}^{3+}$ .

**Fig. S6.** (A) Job's plot showing the 1:1 complex between  $\text{CN}^-$  and **1o**, (B) The association constant of **1o** with  $\text{CN}^-$  was calculated to be  $1.8 \times 10^5 \text{ L}\cdot\text{mol}^{-1}$ , (C) LOD for  $\text{CN}^-$  was  $1.0 \times 10^{-7} \text{ mol L}^{-1}$ .

**Table S1.** Comparative study of analytical performance of **1o** with the recently reported sensors for  $\text{CN}^-$ .

**Fig. S7.** Frontier molecular orbital diagrams and energy gaps of **1o** and **1o**+ $\text{Al}^{3+}$ .

**Fig. S8.** (A) Job's plot showing the 1:1 complex between  $\text{Al}^{3+}$  and **1o**. (B) The association constant of **1o** with  $\text{Al}^{3+}$  was calculated to be  $6.7 \times 10^4 \text{ L mol}^{-1}$  (C) LOD for  $\text{Al}^{3+}$  was  $3.0 \times 10^{-9} \text{ mol L}^{-1}$ .

**Table S2.** Comparative study of analytical performance of **1o** with the recently reported sensors for  $\text{Al}^{3+}$ .

**Table S3.** Truth table for all possible strings of four binary-inputs data and the corresponding output digit of photochromic behavior of **1o**.

**Table S4.** Detection of  $\text{Al}^{3+}$  in natural water samples.

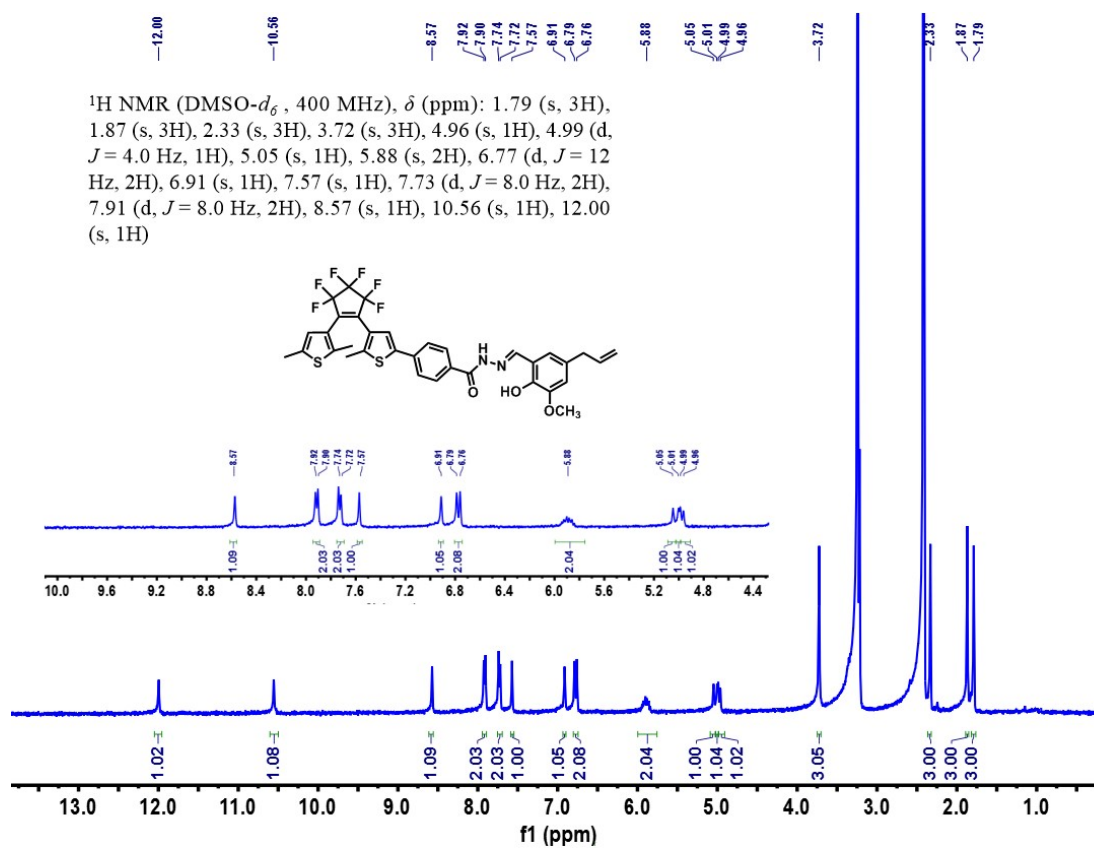

Fig. S1

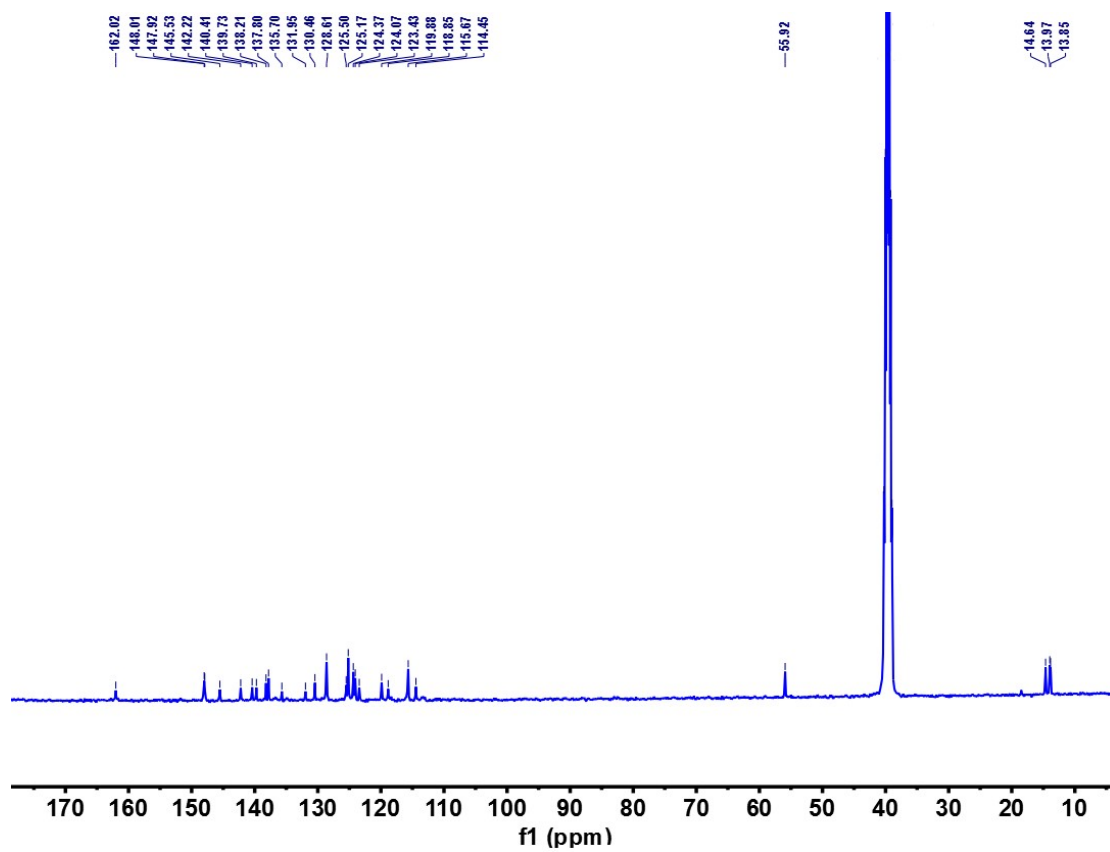

Fig. S2

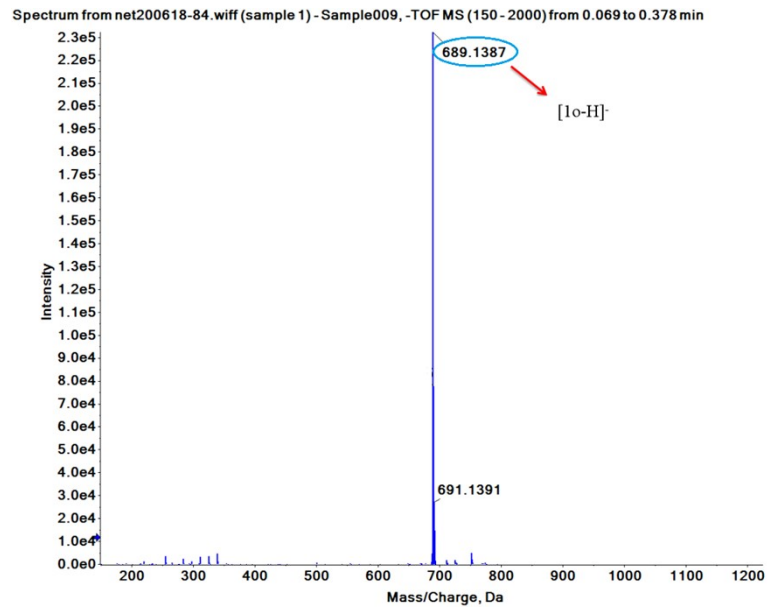

**Fig. S3**

Spectrum from 202007neg-02.wiff (sample 1) - Sample002, -TOF MS (150 - 2000) from 0.056 to 0.374 min

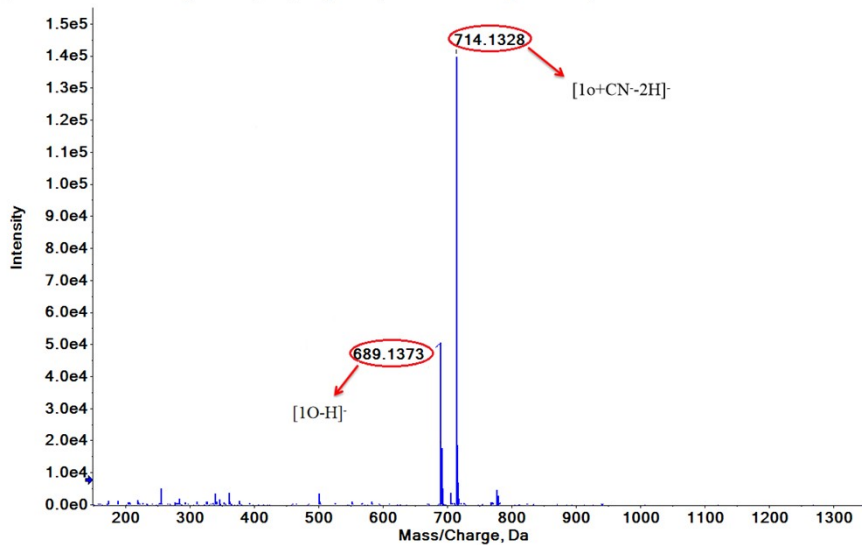

Fig. S4

Spectrum from 202007neg-03.wiff (sample 1) - Sample003, -TOF MS (150 - 2000) from 0.075 to 0.391 min

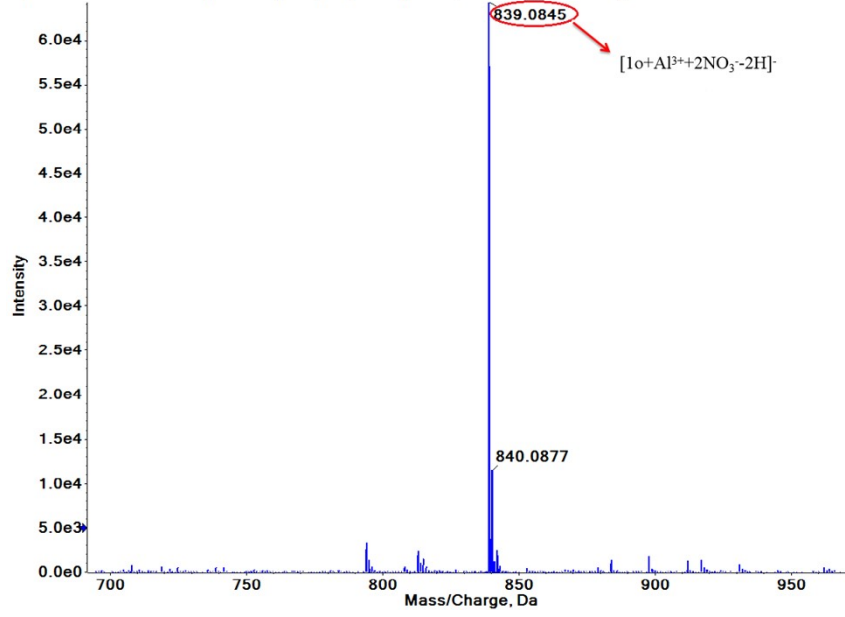

Fig. S5

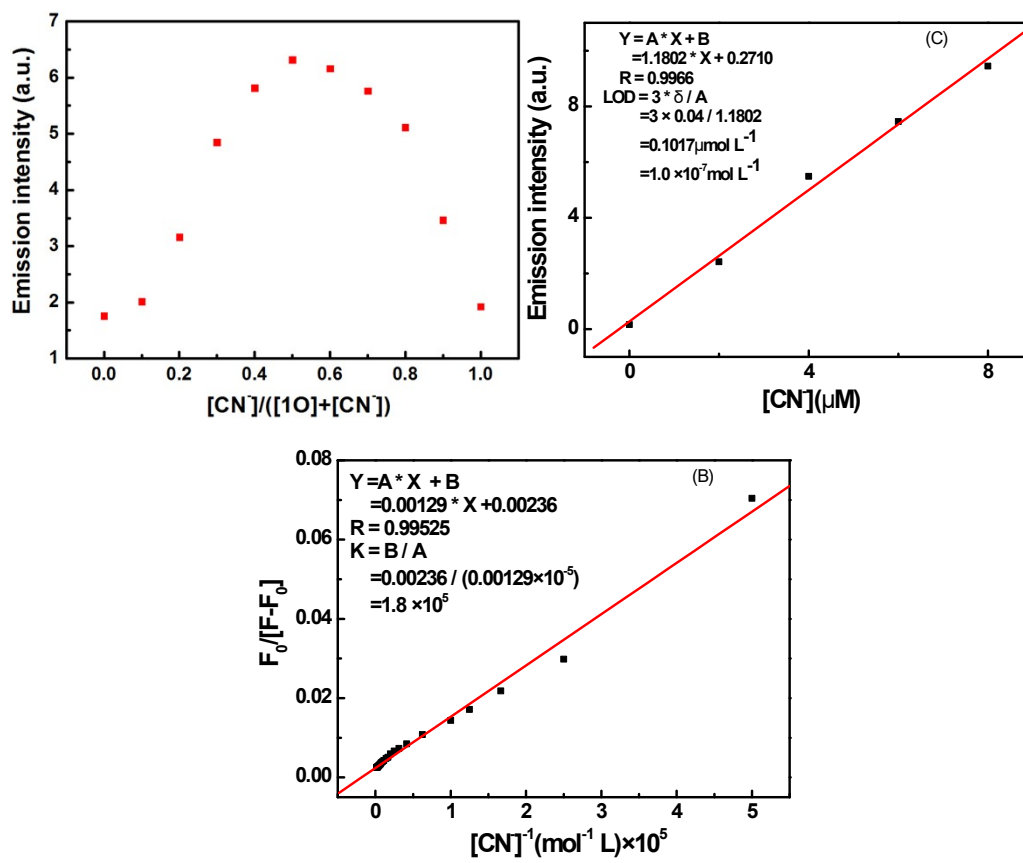

Fig. S6

| Structure                                                                           | Media                                | Detectionlimit (mol L <sup>-1</sup> ) | Association constant | Approaches                  | Ref.         |
|-------------------------------------------------------------------------------------|--------------------------------------|---------------------------------------|----------------------|-----------------------------|--------------|
| 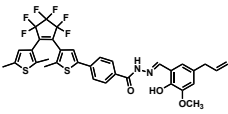   | CH <sub>3</sub> CN                   | $1.0 \times 10^{-7}$                  | $1.80 \times 10^5$   | Colorimetric<br>Fluorescent | Present work |
|    | DMSO/bis-tris buffffer<br>(1/1, v/v) | $1.94 \times 10^{-5}$                 | NO                   | Colorimetric                | 65           |
|    | CH <sub>3</sub> CN                   | $7.145 \times 10^{-7}$                | NO                   | Colorimetric<br>Fluorescent | 66           |
|    | DMSO/H2O<br>(3/2, v/v)               | $4.5 \times 10^{-7}$                  | NO                   | Colorimetric<br>Fluorescent | 67           |
|  | CH <sub>3</sub> CN                   | $1.34 \times 10^{-5}$                 | NO                   | Colorimetric<br>Fluorescent | 68           |
|  | DMSO/H <sub>2</sub> O<br>(1:99, v/v) | $1.12 \times 10^{-6}$                 | NO                   | Colorimetric<br>Fluorescent | 69           |

**Table S1**



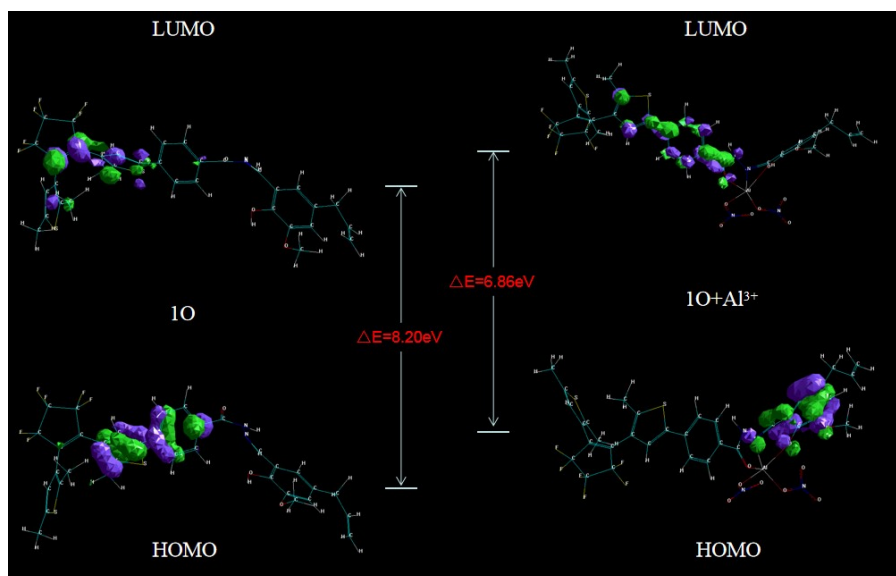

Fig. S7

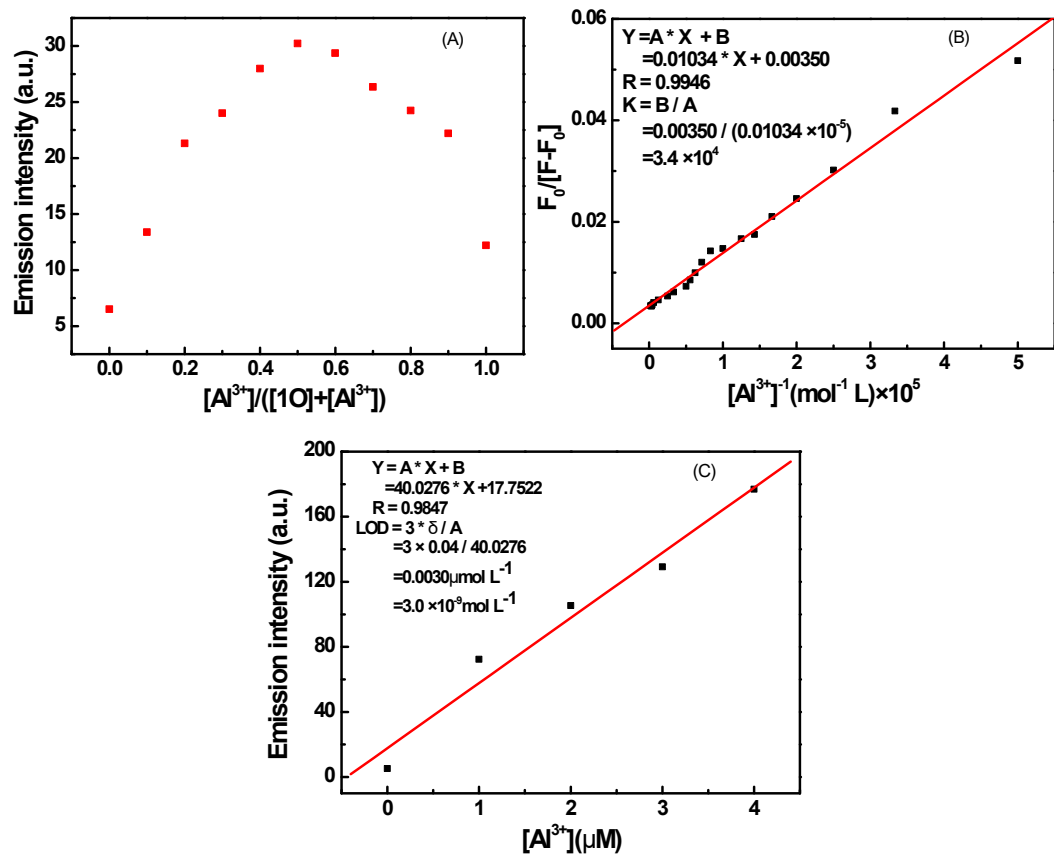

Fig. S8

| Structure                                                                           | Media                                               | Detectionlimit (mol L <sup>-1</sup> ) | Association constant | Approaches                  | Ref.         |
|-------------------------------------------------------------------------------------|-----------------------------------------------------|---------------------------------------|----------------------|-----------------------------|--------------|
| 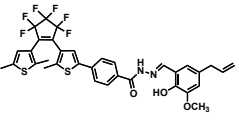   | CH <sub>3</sub> CN                                  | $3.0 \times 10^{-9}$                  | $3.4 \times 10^4$    | Fluorescent                 | Present work |
|    | CH <sub>3</sub> CN : H <sub>2</sub> O<br>(3/7, v/v) | $6.48 \times 10^{-2}$                 | $1.0 \times 10^4$    | Colorimetric<br>Fluorescent | 73           |
|    | MeOH : H <sub>2</sub> O (1/1)                       | $3.55 \times 10^{-7}$                 | $5.42 \times 10^5$   | Colorimetric<br>Fluorescent | 74           |
|    | CH <sub>3</sub> CN                                  | $2.05 \times 10^{-8}$                 | $6.35 \times 10^4$   | Colorimetric<br>Fluorescent | 41           |
|  | MeOH                                                | $4.79 \times 10^{-8}$                 | $1.41 \times 10^4$   | Fluorescent                 | 75           |
|  | MeOH                                                | $7.4 \times 10^{-6}$                  | $7.60 \times 10^4$   | Colorimetric<br>Fluorescent | 76           |

**Table S2**

| Input    |           |                                          |                | output <sup>a</sup>                 |
|----------|-----------|------------------------------------------|----------------|-------------------------------------|
| In1 (UV) | In2 (Vis) | In3 (CN <sup>-</sup> /Zn <sup>2+</sup> ) | In4 (HCl/EDTA) | $\lambda_{em} = 585/534 \text{ nm}$ |
| 0        | 0         | 0                                        | 0              | 0                                   |
| 0        | 0         | 0                                        | 1              | 0                                   |
| 0        | 0         | 1                                        | 0              | 1                                   |
| 0        | 1         | 1                                        | 0              | 1                                   |
| 0        | 1         | 1                                        | 1              | 0                                   |
| 1        | 0         | 0                                        | 0              | 0                                   |
| 1        | 1         | 0                                        | 0              | 0                                   |
| 1        | 1         | 1                                        | 0              | 1                                   |
| 1        | 0         | 1                                        | 0              | 0                                   |
| 1        | 0         | 0                                        | 1              | 0                                   |
| 1        | 0         | 1                                        | 1              | 0                                   |
| 1        | 1         | 1                                        | 1              | 0                                   |
| 1        | 1         | 0                                        | 1              | 0                                   |
| 0        | 1         | 0                                        | 1              | 0                                   |
| 0        | 0         | 1                                        | 1              | 0                                   |
| 0        | 1         | 0                                        | 0              | 0                                   |

<sup>a</sup> When the emission intensity at 585/534 nm more than 426-fold/351-fold of the original state, the output signal is defined as '1', otherwise defined as '0'.

**Table S3**

---

| Sample         | Al <sup>3+</sup> added (uM) | Al <sup>3+</sup> determined (uM) | Recovery (%) |
|----------------|-----------------------------|----------------------------------|--------------|
| Tap water      | 2.00                        | 2.02                             | 101          |
|                | 4.00                        | 4.12                             | 103          |
|                | 8.00                        | 8.32                             | 104          |
| Ganjiang river | 2.00                        | 1.82                             | 91           |
|                | 4.00                        | 3.72                             | 93           |
|                | 8.00                        | 7.44                             | 93           |

---

**Table S4**
